# Supplementary material for: Adherence to Oral Diabetes Medications Among Users and Nonusers of Antipsychotic Medication
Source: Atypon-hosted journal article supplement (doi:10.1176/appi.ps.201300118), 2013-11-15
Supplement: 215_ds001.pdf [file 215_ds001.pdf]

**APPENDIX****Table 1A: Final sample size derived after execution of inclusion criteria**

| Criteria                                                                                                                            | Number remaining |
|-------------------------------------------------------------------------------------------------------------------------------------|------------------|
| No. of patients with an oral anti-diabetic claim between January 1, 2009 and December 31, 2010                                      | 87,251           |
| No. of patients with no oral anti-diabetic claims in the pre-index period                                                           | 43,324           |
| No. of patients continuously enrolled during the pre- and post-index periods                                                        | 22,441           |
| No. of patients with at least 2 oral anti-diabetic claims in the post-index period                                                  | 19,653           |
| No. of patients with either no antipsychotic drug claims or at least 2 antipsychotic drug claims in the pre- and post-index periods | 18,999*          |
| No. of patients with no antipsychotic drug claims in the pre- and post-index periods                                                | 17,043           |
| No. of patients with at least 2 antipsychotic drug claims in the pre- and post-index periods                                        | 1,956            |
| No. of patients in each group post matching based on CDS                                                                            | 1,821            |

\*Patients with only 1 antipsychotic drug claim in either the pre- or post-index period were not included.

**Table 2A: Demographic and clinical characteristics of patients by antipsychotic medication use status in CDS-matched groups**

| Characteristic                                                            | Oral anti-diabetics only<br>(N=2,430) |      | Oral anti-diabetics +<br>Antipsychotics<br>(N=2,430) |      | Test statistic | Degrees<br>of<br>freedom | p-value |
|---------------------------------------------------------------------------|---------------------------------------|------|------------------------------------------------------|------|----------------|--------------------------|---------|
|                                                                           | N                                     | %    | N                                                    | %    |                |                          |         |
| Age at index <sup>a</sup>                                                 | 46.3 ± 13.2                           |      | 46.3 ± 11.6                                          |      | t=0.13         | 2429                     | .895    |
| Gender (Females) <sup>b</sup>                                             | 1,728                                 | 71.1 | 1,534                                                | 63.1 | S=34.53        | 1                        | <.001   |
| Days' supply for the<br>oral anti-diabetic<br>medication <sup>b</sup>     |                                       |      |                                                      |      | S=48.28        | 1                        | <.001   |
| <b>1-30 days</b>                                                          | 993                                   | 40.9 | 1,185                                                | 48.8 |                |                          |         |
| <b>31-60 days</b>                                                         | 758                                   | 31.2 | 756                                                  | 31.1 |                |                          |         |
| <b>More than<br/>60 days</b>                                              | 679                                   | 27.9 | 489                                                  | 20.1 |                |                          |         |
| PDC for oral anti-<br>diabetic medication <sup>a</sup>                    | .54 ± .28                             |      | .61 ± .29                                            |      | t=-8.18        | 2429                     | <.001   |
| Persistence to oral anti-<br>diabetic medication <sup>a</sup>             | 144.8 ± 114.4                         |      | 172.1 ± 123.6                                        |      | t=-8.02        | 2429                     | <.001   |
| Adherent to oral anti-<br>diabetic medication<br>(PDC>=0.80) <sup>b</sup> | 568                                   | 23.4 | 827                                                  | 34.0 | S=64.42        | 1                        | <.001   |

PDC- proportion of days covered

<sup>a</sup> Test statistic used: paired sample t-test

<sup>b</sup> Test statistic used: McNemars test

**Table 3A: Logistic regression analysis of factors associated with post-index oral anti-diabetic medication adherence (PDC  $\geq$  .80)**

| Characteristic                         | X <sup>2</sup> statistic | Odds ratio | 95% CI of odds ratio | p-value |
|----------------------------------------|--------------------------|------------|----------------------|---------|
| Age at index                           | 39.93                    | 1.02       | 1.01-1.02            | <.001   |
| Gender (Female)                        | 14.05                    | .77        | .67-.88              | <.001   |
| CDS                                    | 55.03                    | 1.09       | 1.07-1.12            | <.001   |
| Days' supply                           | 72.31                    |            |                      | <.001   |
| 1-30 days<br>vs. more<br>than 60 days  |                          | .54        | .48-.62              | <.001   |
| 31-60 days<br>vs. more<br>than 60 days |                          | .49        | .42-.57              | <.001   |
| Antipsychotic use (Yes)                | 83.56                    | 1.84       | 1.62-2.09            | <.001   |

CI – Confidence interval

PDC – Proportion of days covered

CDS – Chronic disease score
